# Supplementary material
Source: PubMed Central journal article supplement (PMC10600503)

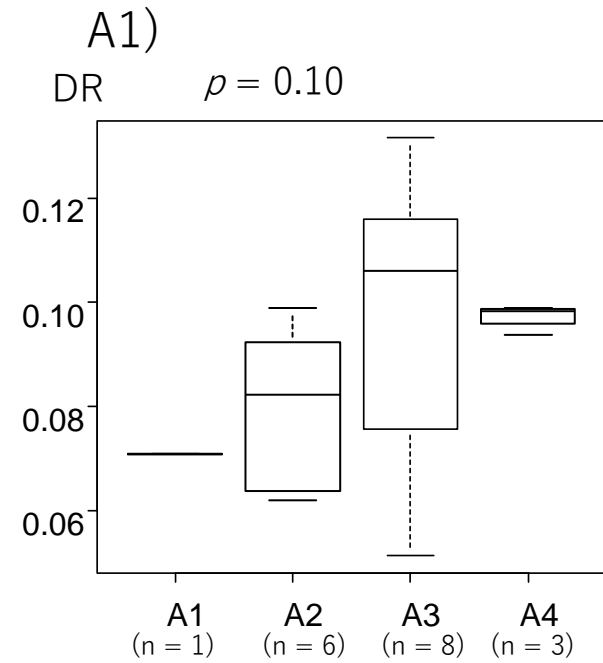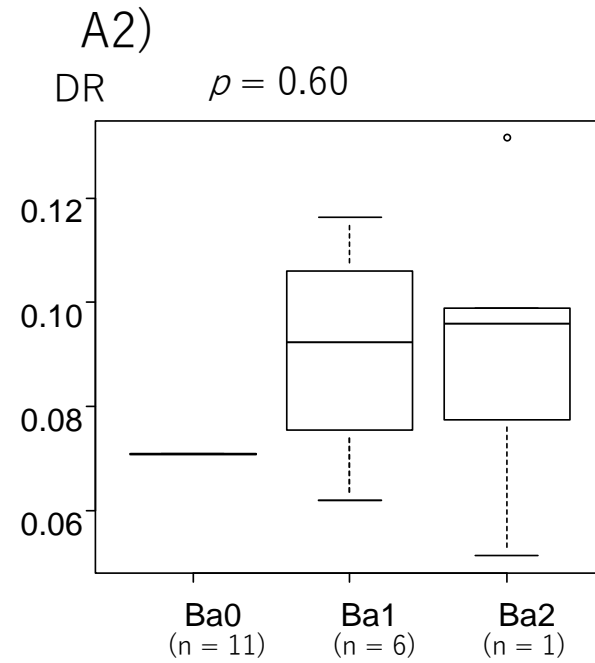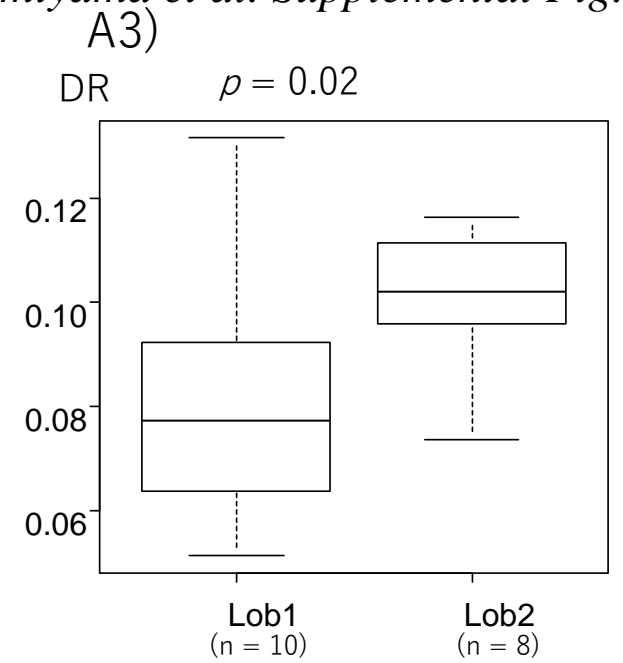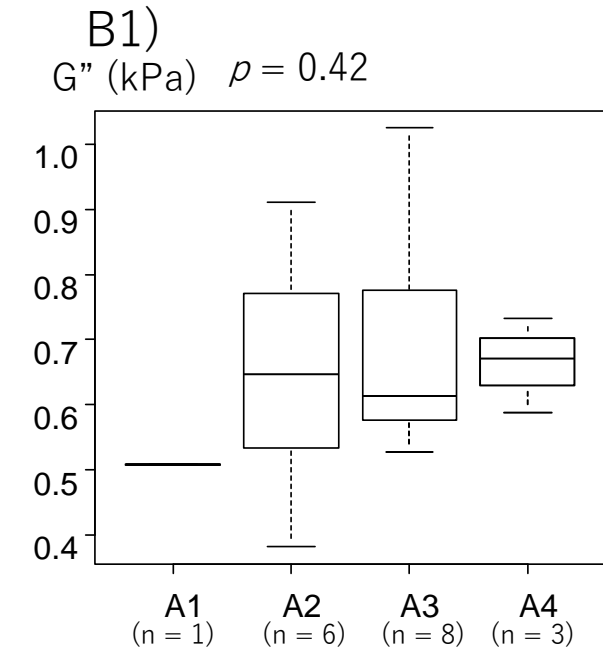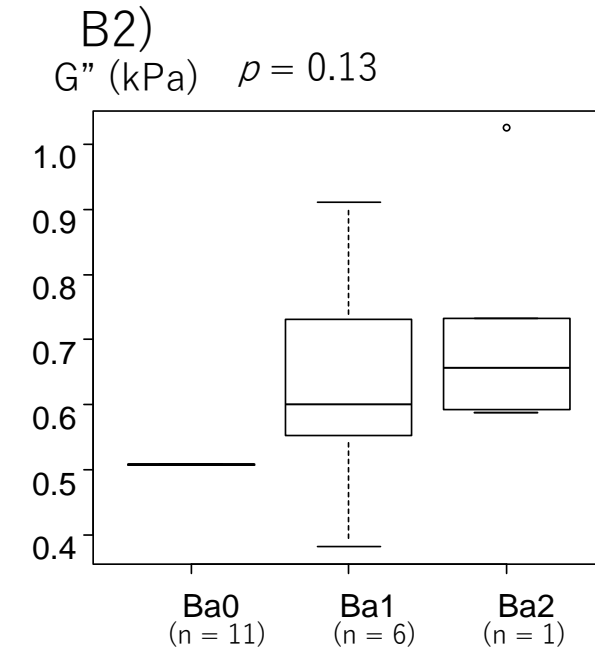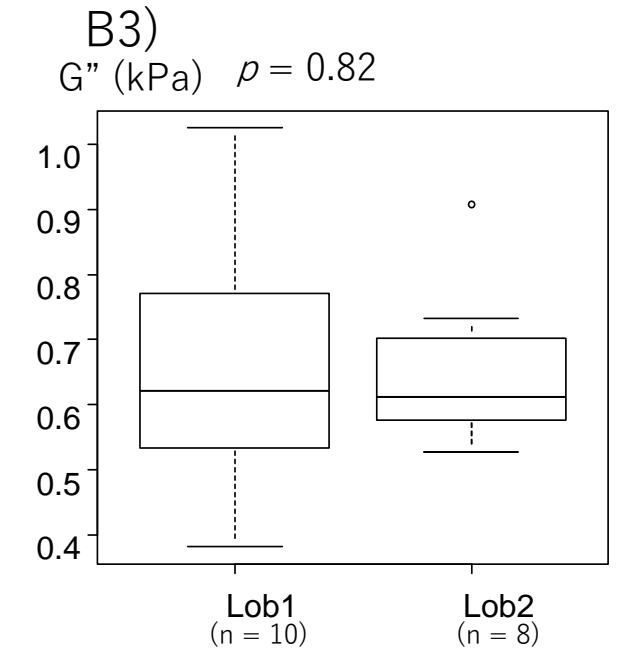

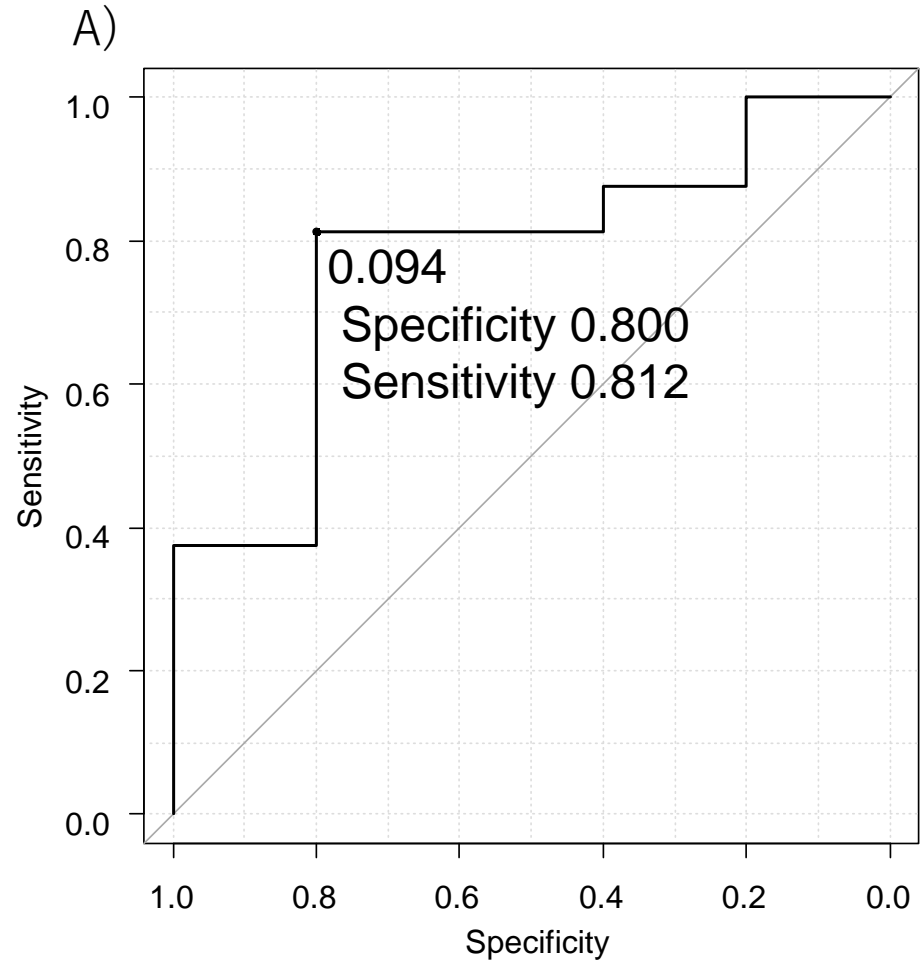

AUC 0.775 (95% CI: 0.529 - 1.000)

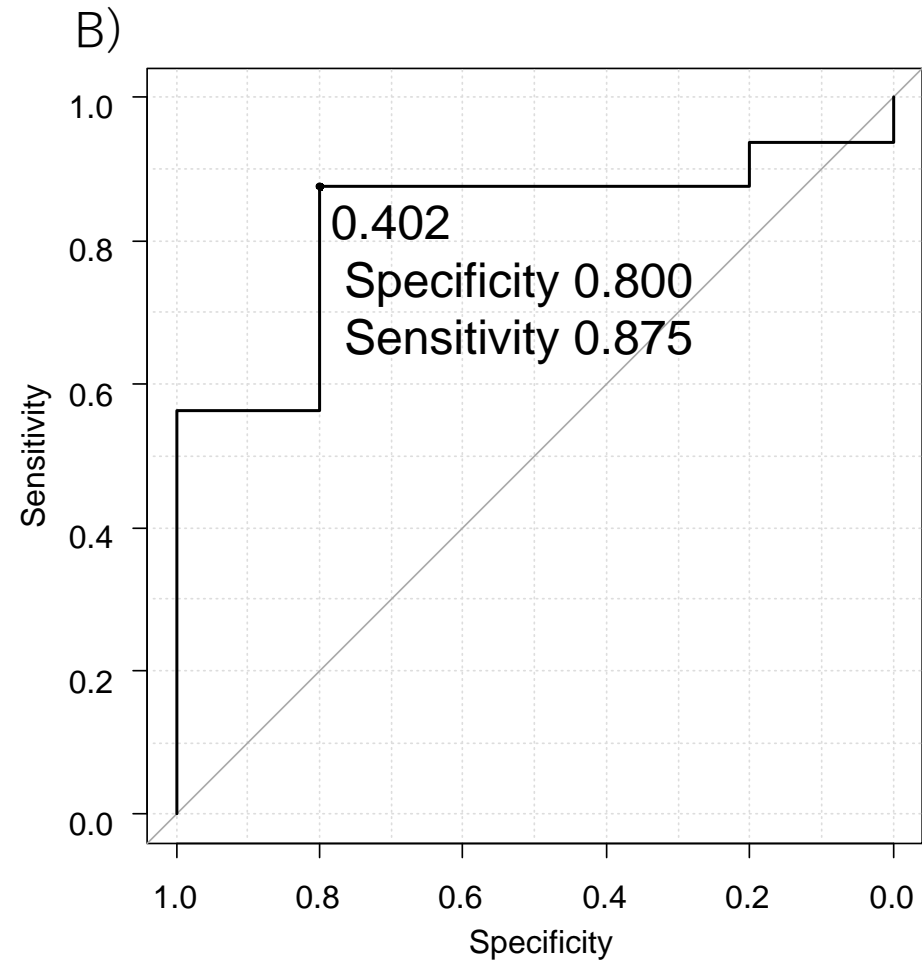

AUC 0.825 (95% CI: 0.628 - 1.000)

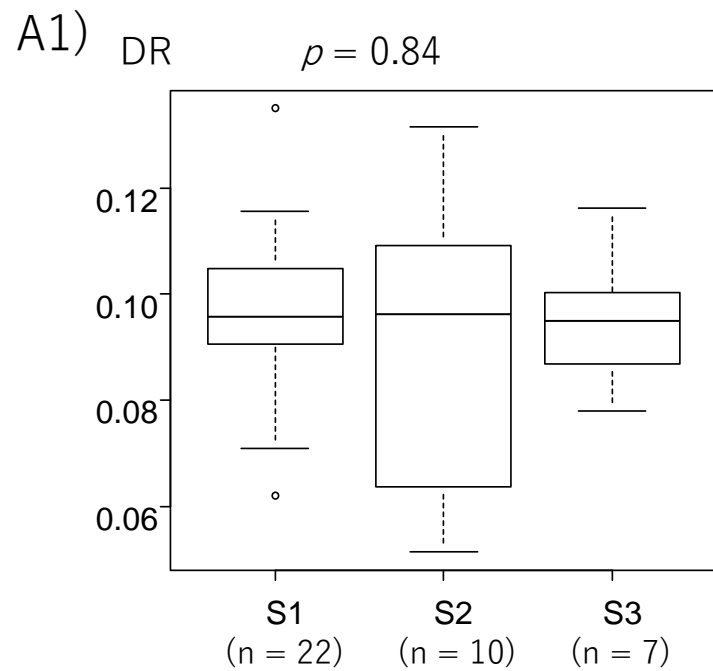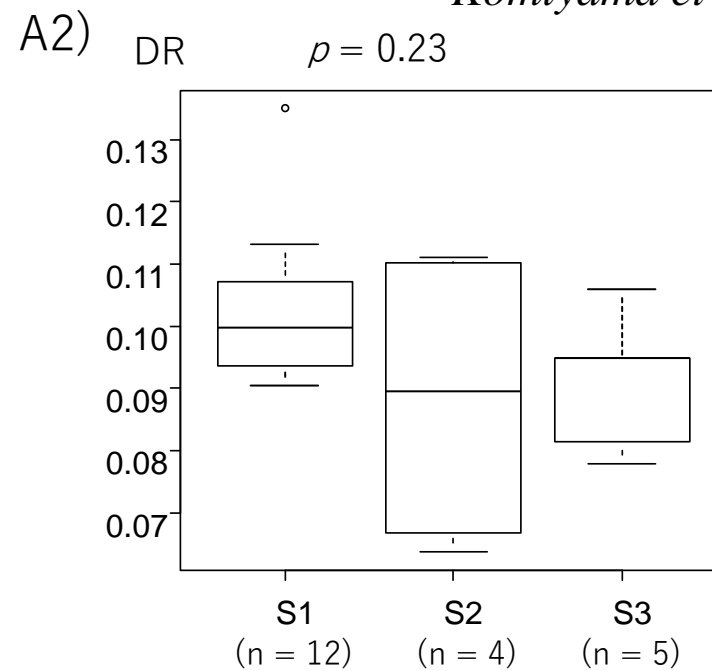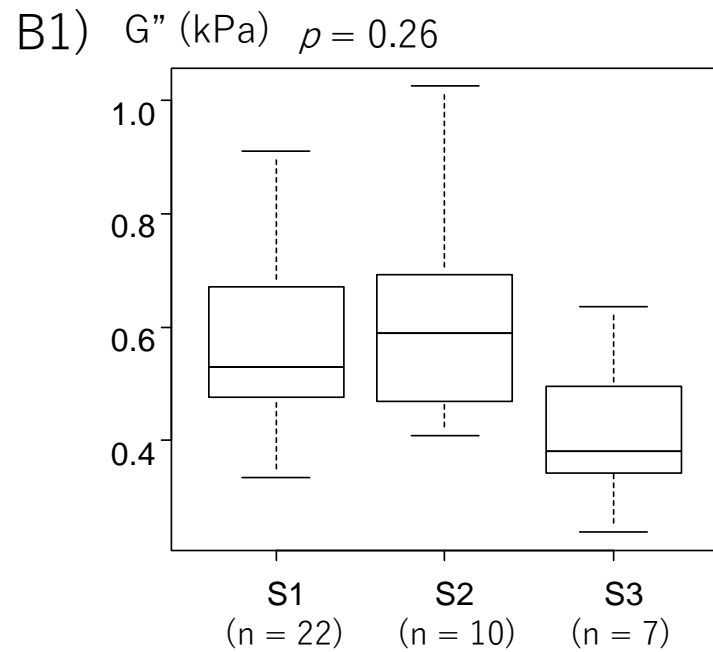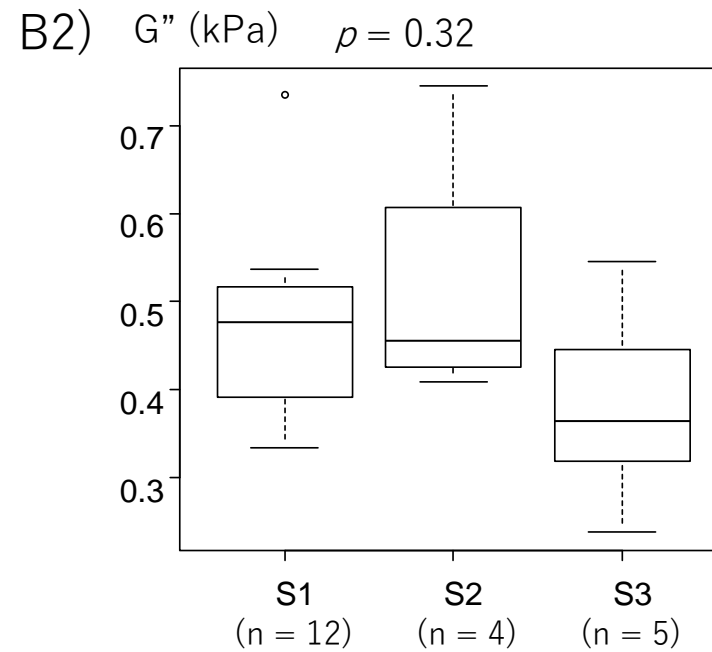

Supplement: NIHMS1933191-supplement-Supp.pdf [file NIHMS1933191-supplement-Supp.pdf]
